# Supplementary material
Source: publisher figshare collection journal article supplement (https://acs.figshare.com/ndownloader/files/4179910)
Supplement: Supplementary file 1 [file 4179910]

# Gold Nanoparticle Assembling On Smooth Silver Spheres for Surface-Enhanced Raman Spectroscopy

Weiwei Xia, Jian Sha, Yanjun Fang, Ren Lu, Yafei Luo, and Yewu Wang

*Department of Physics & State Key Laboratory of Silicon Materials, Zhejiang  
University, Hangzhou 310027, P. R. China*

## Supporting Information

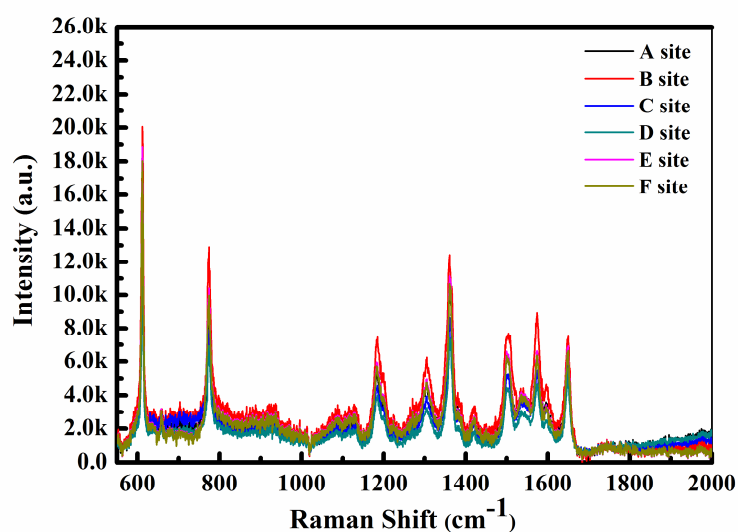

**Figure S1.** SERS spectra collected from the randomly selected six sites of the Ag-capped SiNW arrays after the replacement reaction with 0.04 mM H<sub>AuCl</sub><sub>4</sub> aqueous solution. The reaction temperature is 60 °C.
